# Supplementary material for: Abiotic Factors Promote Cell Penetrating Peptide Permeability in Enterobacteriaceae Models
Source: PubMed Central journal article supplement (PMC6902036; doi:10.3389/fmicb.2019.02534), 2019-11-26
Supplement: Image_1.pdf [file Image_1.pdf]

## *Supplementary Material*

# **Abiotic factors promote cell penetrating peptide permeability in Enterobacteriaceae models**

**Daichi Toyohara<sup>1</sup>, Yasuhito Yokoi<sup>1</sup>, Go Inoue<sup>2</sup>, Takahiro Muraoka<sup>2</sup>, Tetsushi Mori<sup>1\*</sup>**

<sup>1</sup> Department of Biotechnology and Life Science, Tokyo University of Agriculture and Technology,  
2-24-16 Naka-cho, Koganei, Tokyo 184-8588, Japan.

<sup>2</sup> Department of Organic and Polymer Materials Chemistry, Tokyo University of Agriculture and  
Technology, 2-24-16 Naka-cho, Koganei, Tokyo 184-8588, Japan.

**\* Correspondence:**

Tetsushi Mori

[moritets@go.tuat.ac.jp](mailto:moritets@go.tuat.ac.jp)

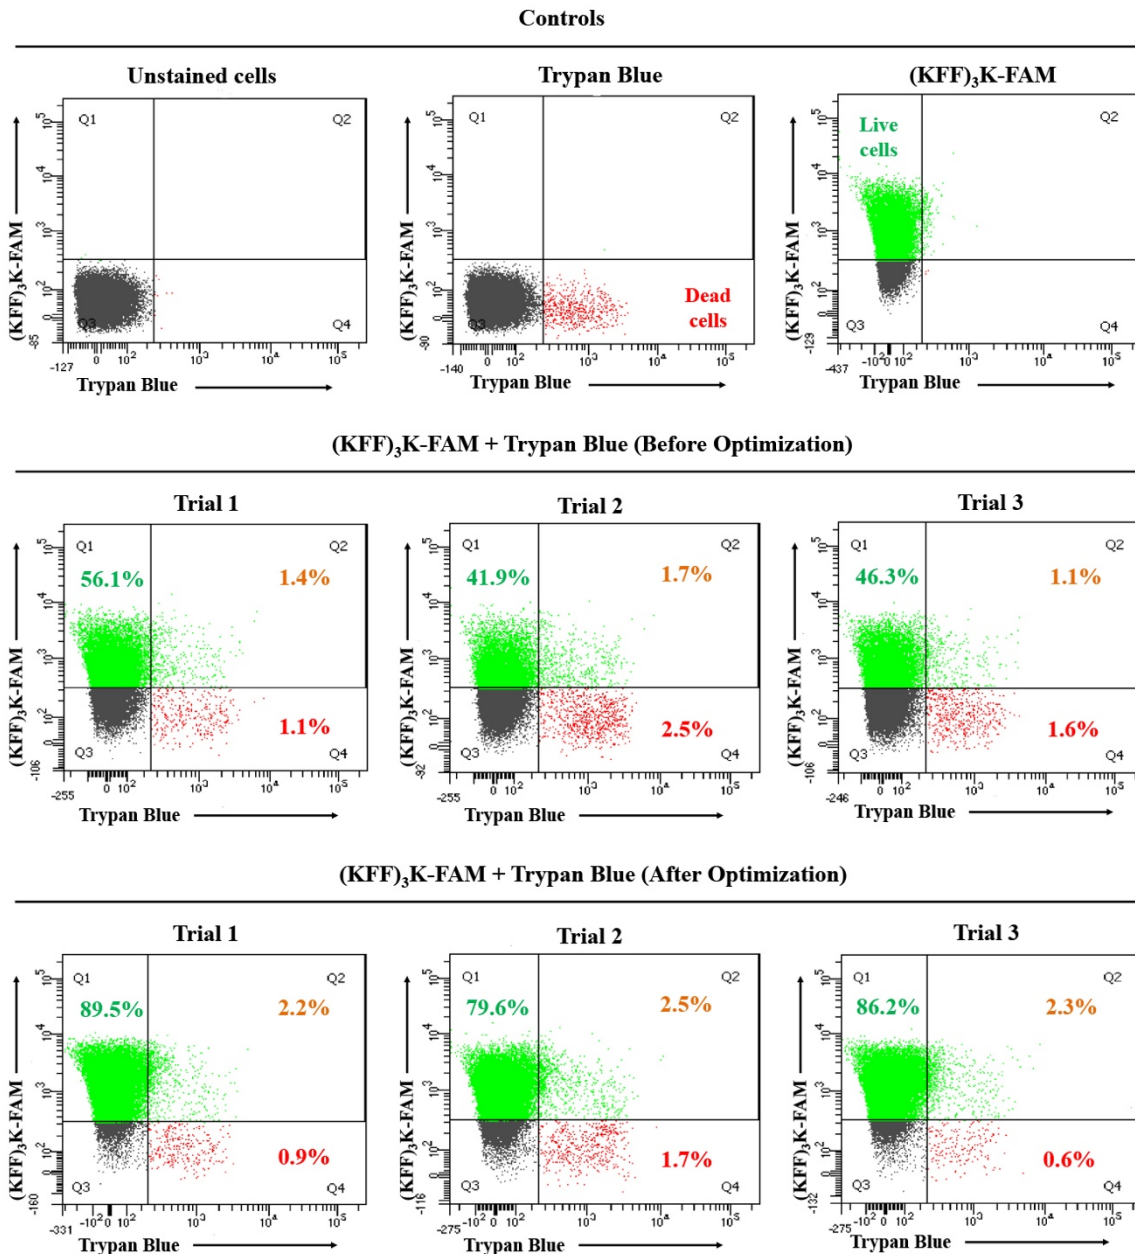

Fig. S1 Flow cytometric analysis of (KFF)<sub>3</sub>K-FAM permeated *E. coli* before and after permeation assay condition optimization. (KFF)<sub>3</sub>K-FAM permeation was performed at 2 μM concentration in PBS at room temperature (23°C; Before) and 37°C (After) for 1 h and subsequently stained with 0.1% Trypan Blue (TB). Untreated cells, cells stained only with TB and cells treated only with (KFF)<sub>3</sub>K-FAM were used as controls. Fluorescence compensation was performed using the auto compensation feature of the BD FACSDiva™ software provided with the cell sorter system.

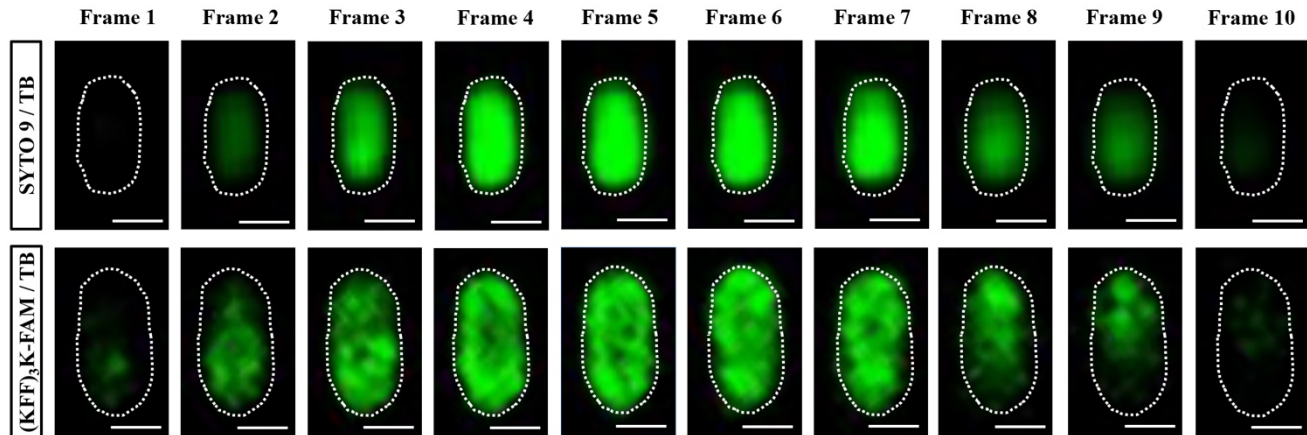

Fig. S2 Z-stack fluorescence microscopic images of *E. coli* cells permeated with SYTO 9 and  $(\text{KFF})_3\text{K-FAM}$ , respectively.  $(\text{KFF})_3\text{K-FAM}$  permeation was performed at  $2 \mu\text{M}$  concentration in PBS at room temperature while SYTO 9 staining was performed based on the manufacturer's protocol. Both samples were stained with 0.1% Trypan Blue (TB) prior to microscopic observation. Z-stack images were captured with the Fluoview FV1000 confocal microscope (Olympus Corporation, Tokyo, Japan) equipped with a 100X objective lens and an Alexa Fluor 488 filter for FAM fluorescence detection. Each frame (1-10) was captured at  $0.2 \mu\text{m}$  intervals to validate the localization of  $(\text{KFF})_3\text{K-FAM}$  and SYTO 9. At Frames 5 and 6 (approximately  $1.0 \mu\text{m}$  cross-section of the cells), we observed that  $(\text{KFF})_3\text{K-FAM}$ , in addition to permeation into the cytoplasm, also accumulated at the cellular membrane (outlined as white dotted lines). SYTO 9 on the other hand showed complete permeation into the cytoplasm. Scale bar is  $2 \mu\text{m}$ .

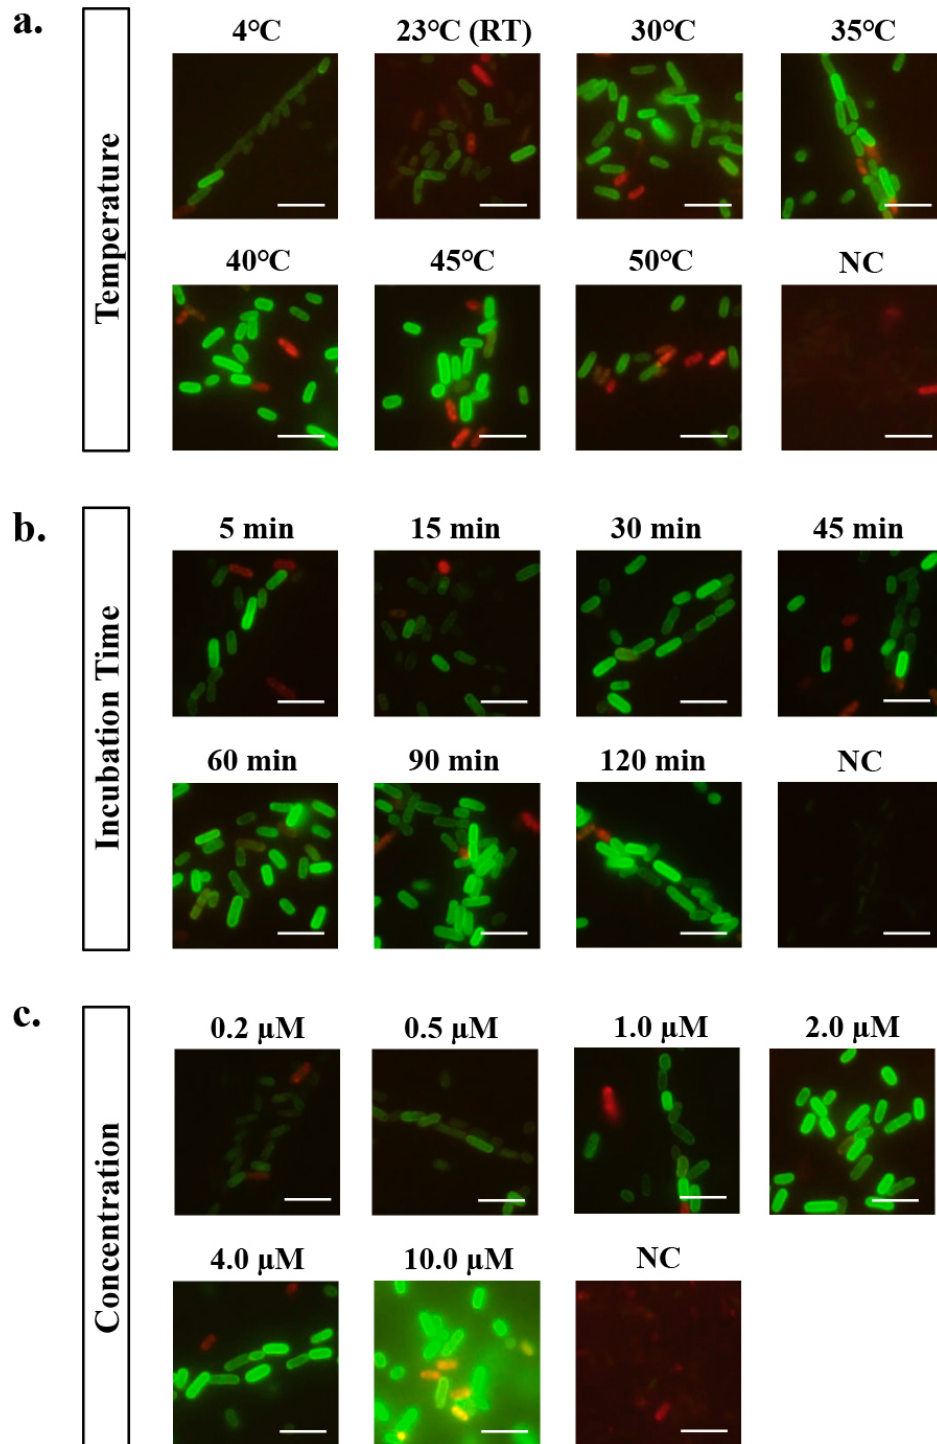

Fig. S3 Optimization of (KFF)<sub>3</sub>K-FAM permeation into *E. coli* based on 3 abiotic factors, a. temperature, b. incubation time and c. (KFF)<sub>3</sub>K-FAM concentration. Optimization was performed sequentially and the optimal condition for each optimized factor was employed in the subsequent optimization step. (KFF)<sub>3</sub>K-FAM untreated cells stained with Trypan Blue at each condition was used as negative controls (NC). Scale bar is 5 μm.

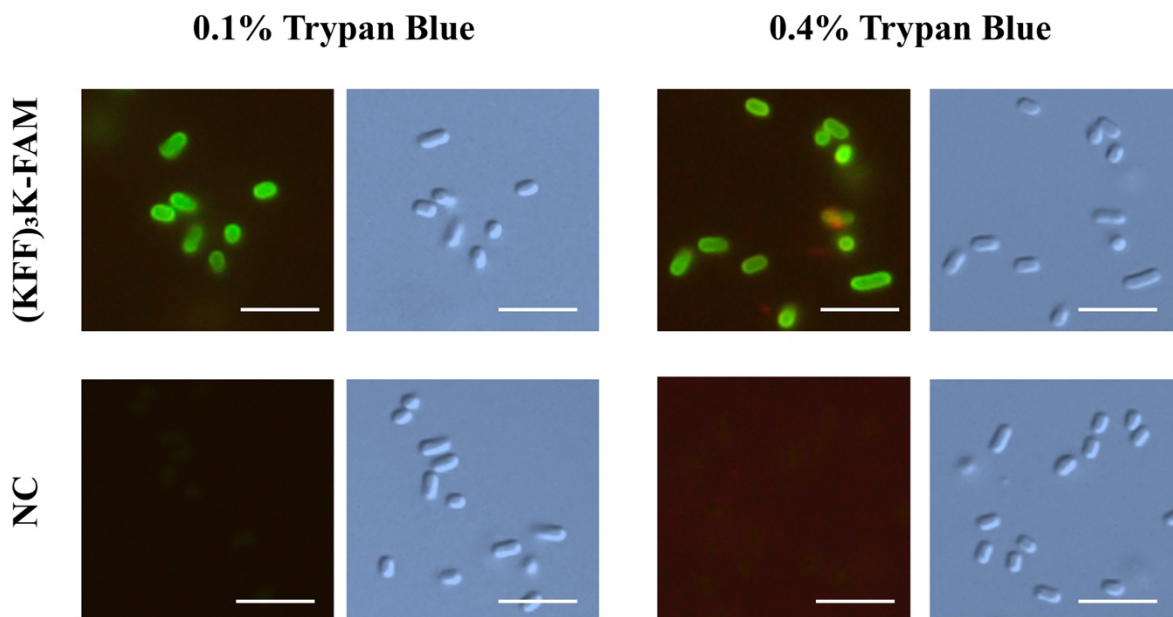

Fig. S4 Fluorescence and bright field microscopic images of (KFF)<sub>3</sub>K-FAM permeated *E. coli* cells treated with 0.1% and 0.4% Trypan Blue (TB) concentration. (KFF)<sub>3</sub>K-FAM permeation was performed based on the conditions after optimization (2  $\mu$ M, OT, 1 h, 50% PBS; OT: optimal growth temperature). (KFF)<sub>3</sub>K-FAM untreated cells stained with TB at each condition was used as negative controls (NC). Images of (KFF)<sub>3</sub>K-FAM permeated cells and the negative controls were captured at similar exposure times to allow for comparison. Scale bar is 5  $\mu$ m.

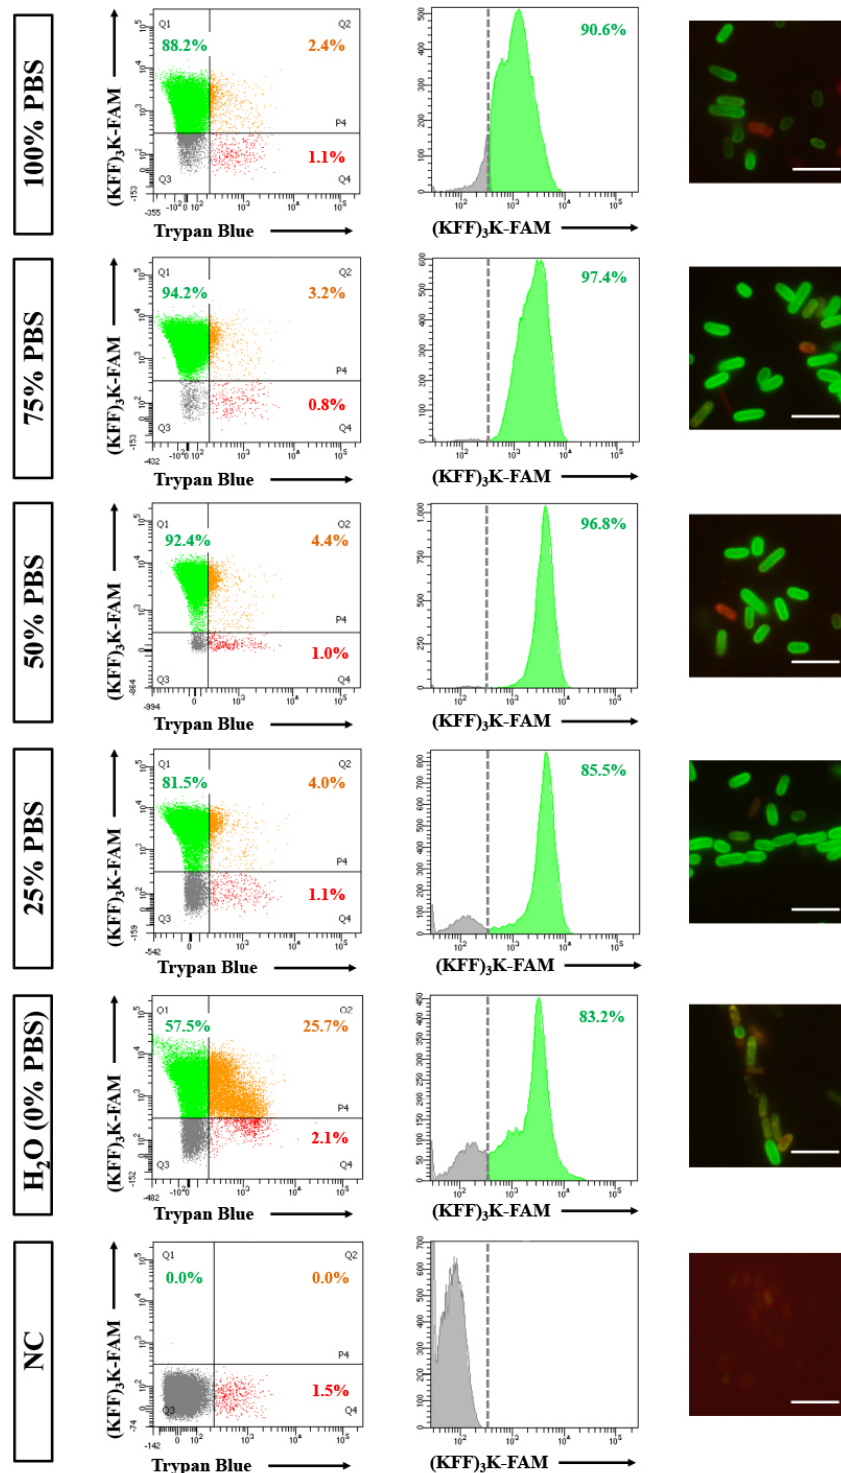

Fig. S5 Flow cytometric analysis of (KFF)<sub>3</sub>K-FAM permeated cells at 0 (H<sub>2</sub>O) – 100% PBS. (KFF)<sub>3</sub>K-FAM incubation was performed with 2 μM concentrations at 37°C for 1 h followed by 0.1% Trypan Blue (TB) staining. Non-(KFF)<sub>3</sub>K-FAM permeated cells were used as the negative control (NC). (KFF)<sub>3</sub>K-FAM permeation was further confirmed by fluorescence microscopy. Scale bar is 5 μm.



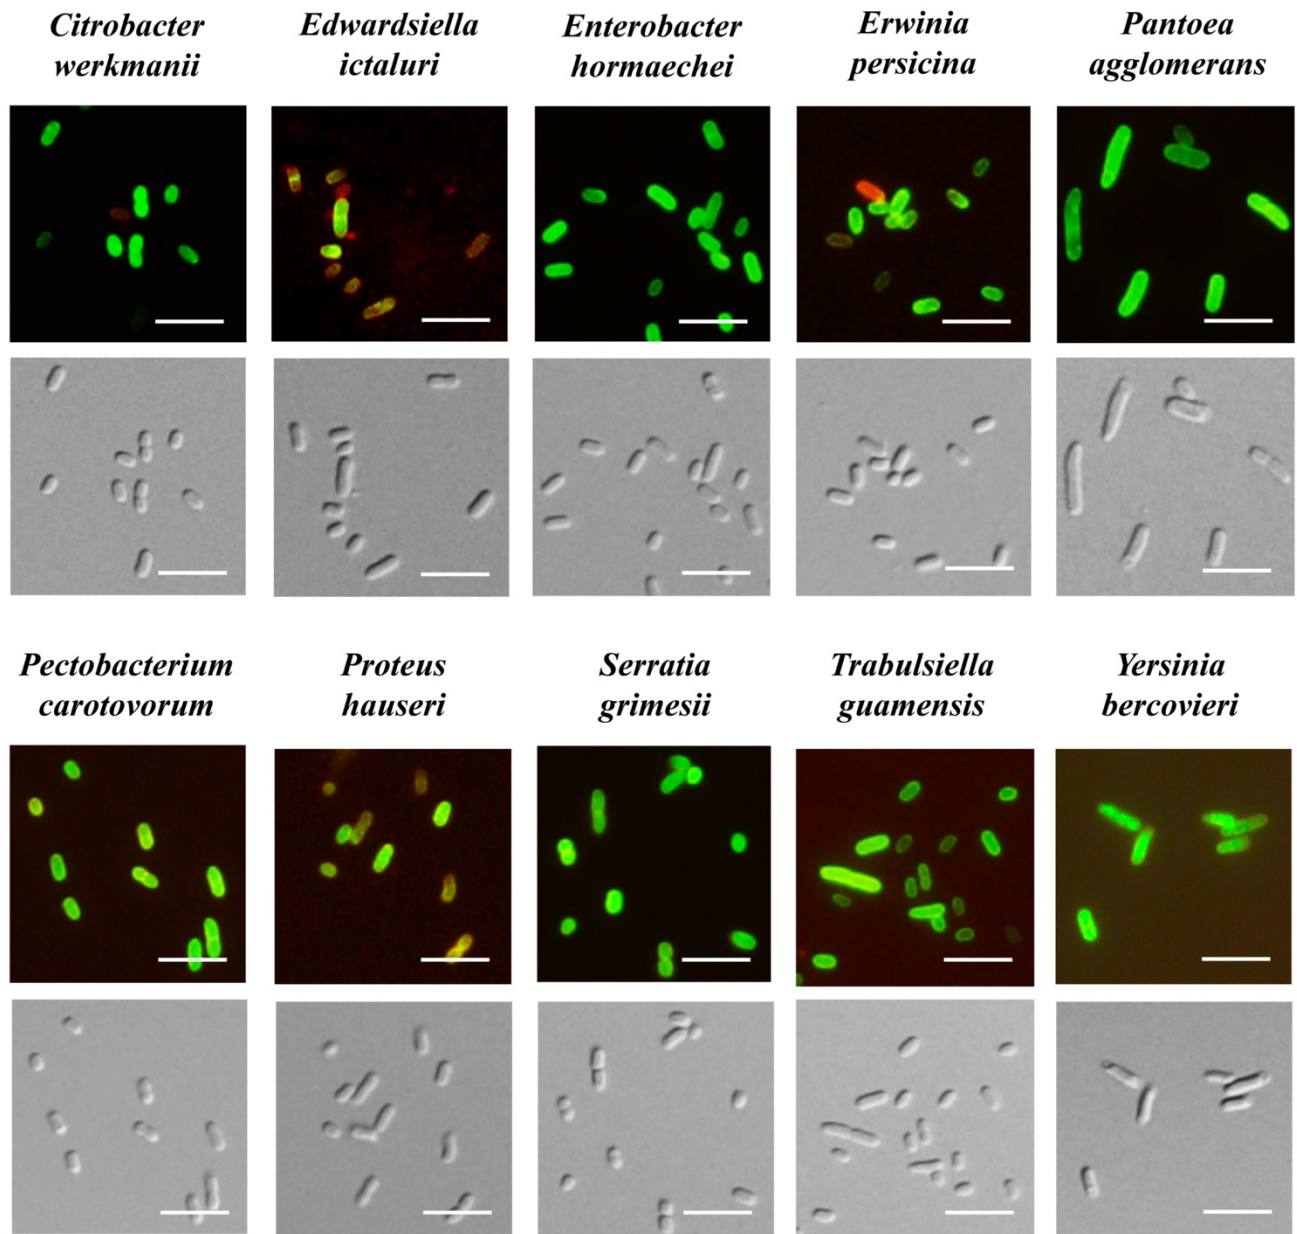

Fig. S6 Fluorescence and bright field microscopic images of Enterobacteriaceae strains permeated with  $(\text{KFF})_3\text{K-FAM}$ .  $(\text{KFF})_3\text{K-FAM}$  permeation was performed based on the conditions after optimization ( $2\ \mu\text{M}$ , OT, 1 h, 50% PBS; OT: optimal growth temperature) followed by 0.1% Trypan Blue staining. Scale bar is  $5\ \mu\text{m}$ .
